# Supplementary material for: Nanozyme-catalyzed cascade reaction enables a highly sensitive detection of live bacteria
Source: Royal Society of Chemistry journal article supplement (doi:10.1039/d3tb00441d), 2023-01-01
Supplement: d3tb00441d1.pdf [file d3tb00441d1.pdf]

## **Nanozyme-Catalyzed Cascade Reaction Enables Highly Sensitive Detection of Live Bacteria**

Xuwei Liao,<sup>a,b</sup> Wenjun Tong,<sup>b</sup> Li Dai,<sup>a</sup> Lingfei Han,<sup>a</sup> Hanjun Sun,<sup>b</sup> Wenyan Liu,<sup>\*a</sup>  
Chen Wang<sup>\*b</sup>

<sup>a</sup> College of Pharmacy, China Pharmaceutical University, Nanjing 211198, China

<sup>b</sup> College of Chemistry and Materials Science, Analytical & Testing Center, Nanjing  
Normal University, Nanjing 210023, China

Corresponding E-mail: liuwenyan@cpu.edu.cn; wangchen@njnu.edu.cn

## Contents

**Figure S1.** TEM images of Au NPs

**Figure S2.** TEM images of Au@POM NPs with 120 min light illumination

**Figure S3.** Visible absorbance spectra of AuNPs catalyzed reaction system with GOx-like activity and the corresponding double reciprocal plots of nanozyme reaction.

**Figure S4.** Visible absorbance spectra of the reaction system of POMs + Glucose.

**Figure S5.** Visible absorbance spectra of the cascade reaction systems with varied reaction time.

**Figure S6.** Visible absorbance spectra of the cascade reaction systems with varied glucose concentration.

**Figure S7.** Visible absorbance spectra of the cascade reaction systems under different temperatures.

**Figure S8.** Visible absorbance spectra of the cascade reaction systems under pH values.

**Figure S9.** The standard curve of peak absorbance intensity at 625 nm versus the concentration of *S. aureus* bacterium.

**Figure S10.** (C) Visible absorbance spectra of the system after addition of different content of *E. coli* bacteria.

**Figure S11.** The standard curve of peak absorbance intensity at 625 nm versus the concentration of *E. coli* bacterium.

**Figure S12.** The stability of the present sensor towards glucose detection.

**Table S1.** Comparison of the performance of different biosensors for bacterial detection.

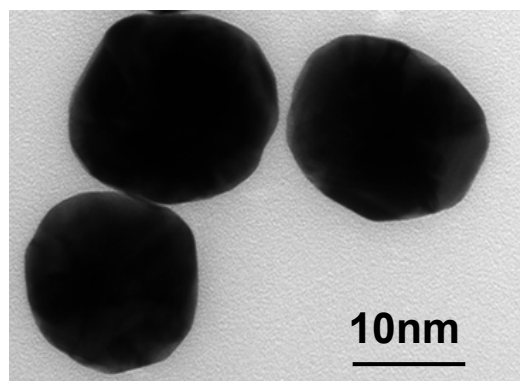

**Figure S1.** TEM images of AuNPs.

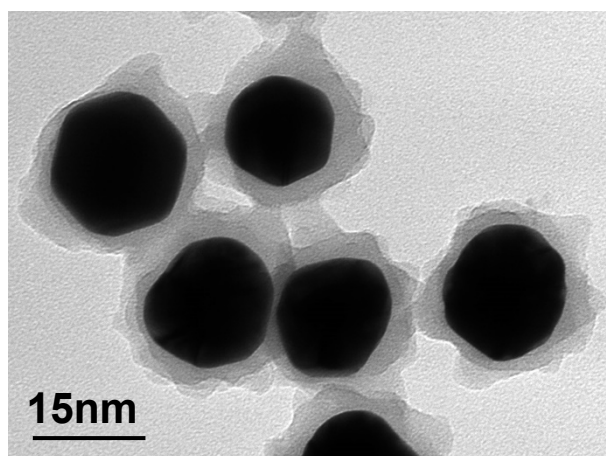

**Figure S2.** TEM images of Au@POM NPs with 120 min light illumination.

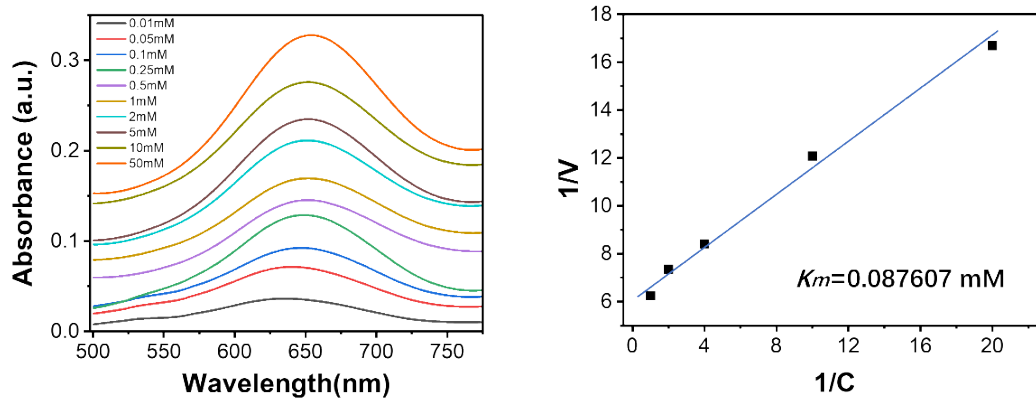

**Figure S3.** Visible absorbance spectra of AuNPs catalyzed reaction with GOx-like activity and the corresponding double reciprocal plots of nanozyme reaction.

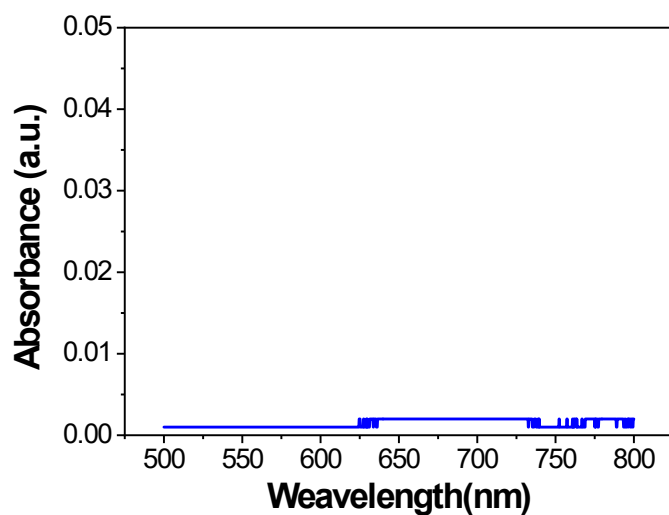

**Figure S4.** Visible absorbance spectra of the reaction system of POMs + Glucose.

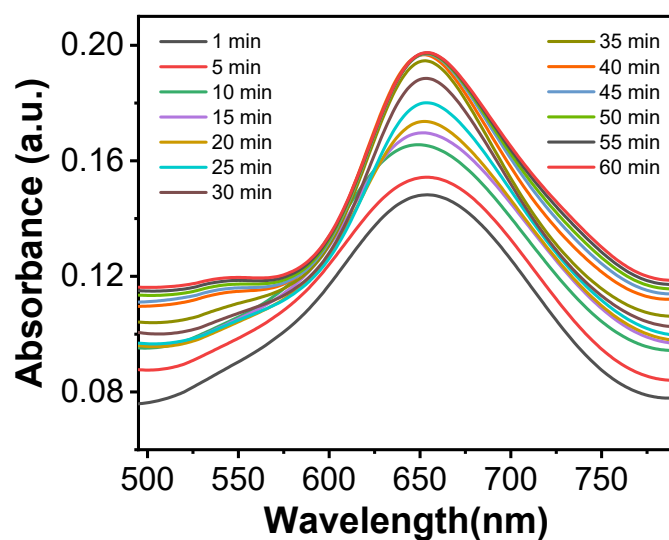

**Figure S5.** Visible absorbance spectra of the cascade reaction systems with varied reaction time.

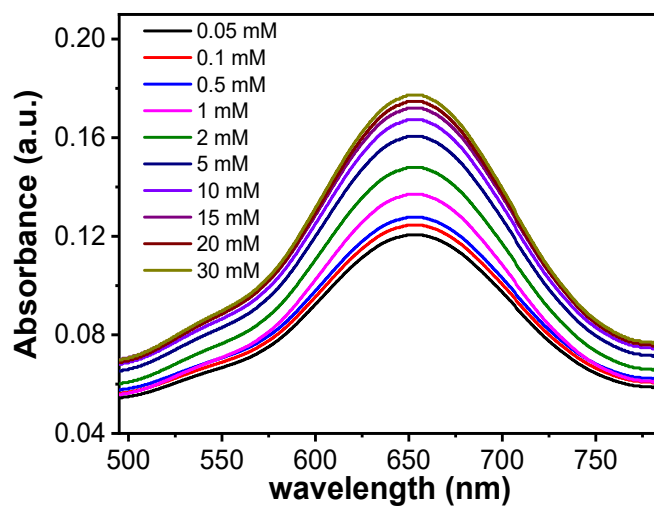

**Figure S6.** Visible absorbance spectra of the cascade reaction systems with varied glucose concentration.

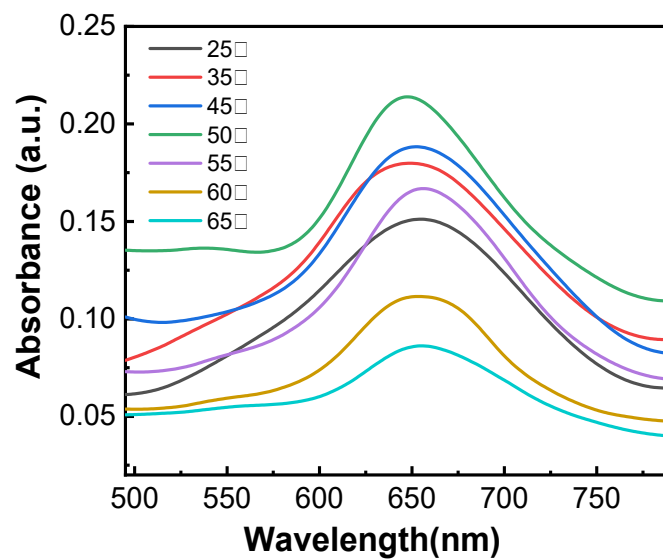

**Figure S7.** Effect of temperature on the nanozyme activity.

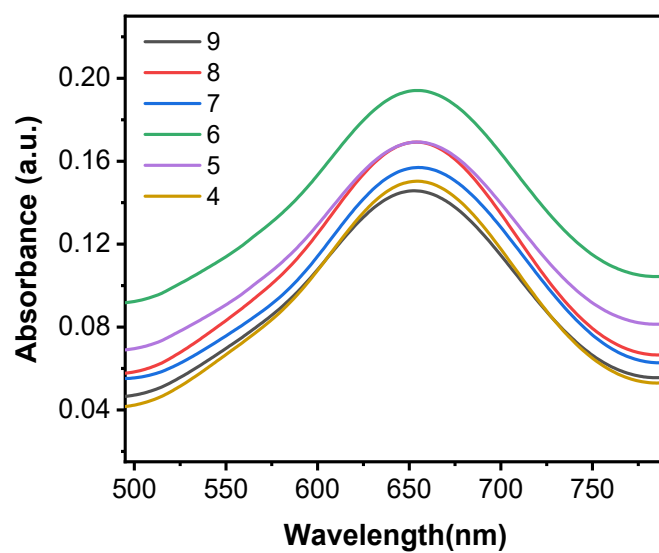

**Figure S8.** Visible absorbance spectra of the cascade reaction systems under pH values.

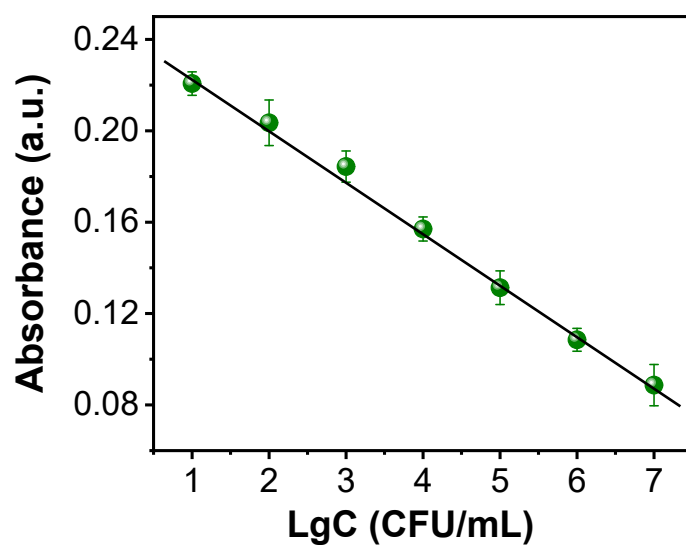

**Figure S9.** The standard curve of peak absorbance intensity at 625 nm versus the concentration of *S. aureus* bacterium.

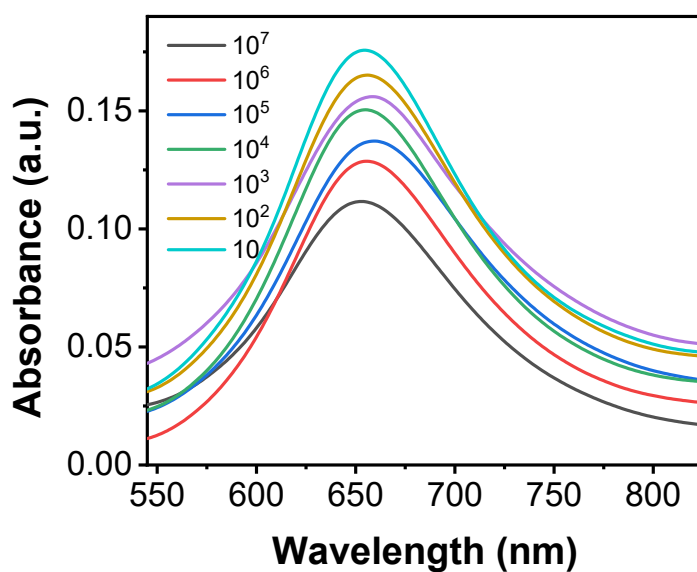

**Figure S10.** Visible absorbance spectra of the system after addition of different content of *E. coli* bacteria.

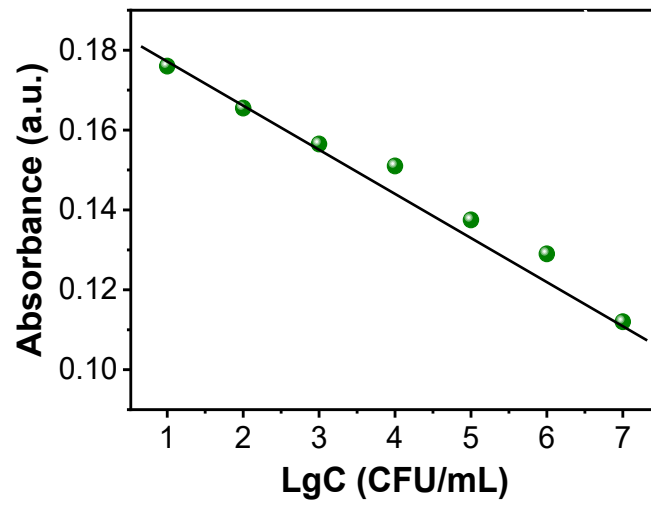

**Figure S11.** The standard curve of peak absorbance intensity at 625 nm versus the concentration of *E. coli* bacterium.

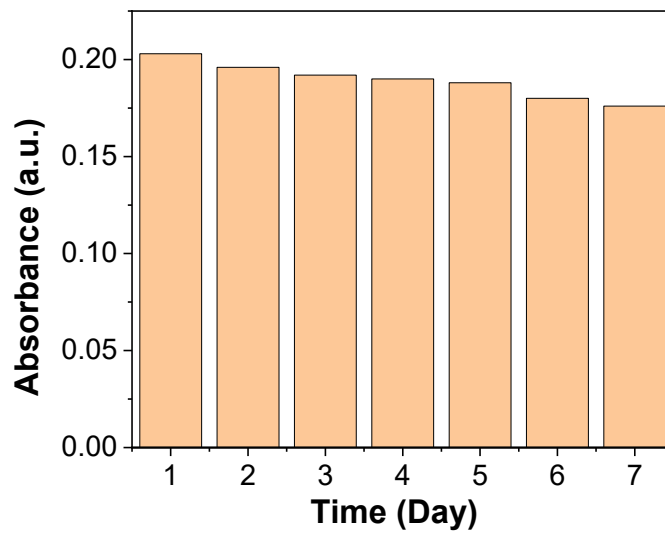

**Figure S12.** The stability of the present sensor towards glucose detection.



**Table S1.** Comparison of the performance of different biosensors for bacterial detection.

| Detection Technique | Linear range (CFU/mL)                   | Detection limit (CFU/mL) | Reference        |
|---------------------|-----------------------------------------|--------------------------|------------------|
| Fluorescent         | $1.0 \times 10^3 - 1.0 \times 10^9$     | $2.9 \times 10^2$        | S1               |
| Fluorescent         | 50 - $10^7$                             | 8                        | S2               |
| Flow cytometry      | $3.3 \times 10^1 - 3.3 \times 10^5$     | 33                       | S3               |
| Flow cytometry      | $1.5 \times 10^2 - 1.5 \times 10^6$     | 40                       | S4               |
| Colorimetric        | $10^2 - 10^7$                           | 24                       | S5               |
| Colorimetric        | $10^2 - 10^7$                           | 85                       | S6               |
| SERS                | $10^2 - 10^7$                           | 35                       | S7               |
| Microfluidic        | 500 - $5.0 \times 10^4$                 | 50                       | S8               |
| Electrochemical     | $10^3 - 10^5$                           | 845                      | S9               |
| Electrochemical     | 10 - $10^7$                             | 13                       | S10              |
| Digital reading     | $10^5 - 10^8$                           | $10^4$                   | S11              |
| Nanozyme            | 100 - $1.0 \times 10^5$                 | 22                       | S12              |
| <b>Nanozyme</b>     | <b><math>5 - 1.0 \times 10^7</math></b> | <b>5</b>                 | <b>This work</b> |

SERS: Surface-Enhanced Raman Scattering.

## Reference

- S1. Kong, W. J.; Xiong, J.; Yue, H.; Fu, Z. F. *Anal. Chem.* **2015**, *87* (19), 9864-9868.
- S2. Cui, F. C.; Sun, J. D.; Habimana, J. D.; Yang, X. X.; Ji, J.; Zhang, Y. Z.; Lei, H. T.; Li, Z. J.; Zheng, J. Y.; Fan, M. H.; Sun, X. L. *Anal. Chem.* **2019**, *91* (22), 14681-14690.
- S3. Meng, X. Y.; Yang, G. T.; Li, F. L.; Liang, T. B.; Lai, W. H.; Xu, H. Y. *ACS Appl. Mater. Interfaces.* **2017**, *9* (25), 21464-21472.
- S4. Wang, Y. R.; He, Y.; Bhattacharyya, S.; Lu, S. G.; Fu, Z. F. *Anal. Chem.* **2020**, *92* (4), 3340-3345.
- S5. Li, D. K.; Fang, Y. S.; Zhang, X. M. *ACS Appl. Mater. Interfaces.* **2020**, *12* (8), 8989-8999.
- S6. Yu, T.; Xu, H.; Zhao, Y.; Han, Y.; Zhang, Y.; Zhang, J.; Xu, C.; Wang, W.; Guo, Q.; Ge, J. *Scientific Reports.* **2020**, *10* (1).
- S7. Zhang, H.; Ma, X. Y.; Liu, Y.; Duan, N.; Wu, S. J.; Wang, Z. P.; Xu, B. C. *Biosens. Bioelectron.* **2015**, *74*, 872-877.
- S8. Zheng, L.Y.; Cai, G.Z.; Wang, S.Y.; Liao, M.; Li, Y. B.; Lin, J. H. *Biosens. Bioelectron.* **2019**, *124*, 143-149.
- S9. Nemr, C. R.; Smith, S. J.; Liu, W. H.; Mephram, A. H.; Mohamadi, R. M.; Labib, M.; Kelley, S. O. *Anal. Chem.* **2019**, *91*, 2847-2853.
- S10. Bhardwaj, J.; Devarakonda, S.; Kumar, S.; Jang, J. *Sens. Actuator B-Chem.* **2017**, *253*, 115-123.
- S11. Huang, H. R.; Zhao, G.Y.; Dou, W. C. *Biosens. Bioelectron.* **2018**, *107*, 266-271.
- S12. Zhou, J.; Tian, F. Y.; Fu, R. J.; Yang, Y. J.; Jiao, B. N.; He, Y. *ACS Appl. Nano*

*Mater.* **2020**, *3*, 9016-9025.
